# Supplementary material
Source: PubMed Central journal article supplement (PMC524698)
Supplement: pnas_101_45_15938__3.pdf [file pnas_101_45_15938__3.pdf]

**Table 2. Model parameters**

| Symbol                                                              | Meaning                                    | Value                                       | Ref. |
|---------------------------------------------------------------------|--------------------------------------------|---------------------------------------------|------|
| Model parameters with little effect on the rate of early anaphase B |                                            |                                             |      |
| $F_m$                                                               | Maximal motor force                        | 1 pN                                        | 1    |
| $N$                                                                 | Number of overlapping arrays of ipMTs      | 30-90                                       | 2, 3 |
| $k$                                                                 | Number of motors per unit length           | 20/ $\mu\text{m}$                           | 2    |
| $\mu$                                                               | Effective spindle viscous drag coefficient | 1000pN·sec/ $\mu\text{m}$                   | 4    |
| $V_{\text{poly}}^+$                                                 | Mean ipMT plus end elongation rate         | 0.01-0.1 $\mu\text{m}/\text{sec}$           | 4    |
| $v_{\text{growth}}$                                                 | ipMT plus end growth rate                  | 0.16 $\mu\text{m}/\text{sec}$               | 5    |
| $v_{\text{shrink}}$                                                 | ipMT plus end shrinkage rate               | 0.16 $\mu\text{m}/\text{sec}$               | 5    |
| $f_{\text{rescue}}$                                                 | ipMT plus end rescue frequency             | 0.1-0.5 /sec                                | 5    |
| $f_{\text{catastrophe}}$                                            | ipMT plus end catastrophe frequency        | 0.01-0.5 /sec                               | 5    |
| Model parameters which affect the rate of anaphase B                |                                            |                                             |      |
| $V_m$                                                               | Free sliding motor rate                    | 0.07 $\mu\text{m}/\text{sec}$               | 6    |
| $V_{\text{depoly}}^-$                                               | ipMT minus end depolymerization rate       | Variable (0-0.07 $\mu\text{m}/\text{sec}$ ) |      |

1. Schnitzer, M. J., Visscher, K. & Block, S. M., (2000) *Nat. Cell Biol.* **2**, 718-723.
2. Sharp, D. J., McDonald, K. L., Brown, H. M., Matthies, H. J., Walczak, C., Vale, R. D., Mitchison, T. J. & Scholey, J. M. (1999) *J. Cell Biol.* **144**, 125-138
3. Mastronarde, D. N., McDonald, K. L., Ding, R. & McIntosh, J.R. (1993) *J. Cell Biol.* **123**, 1475-1489.
4. Cytrynbaum, E. N., Scholey, J. M. & Mogilner, A. (2003) *Biophys. J.* **84**, 757-769.
5. Rusan, N. M., Tulu, U. S., Fagerstrom, C. & Wadsworth, P. (2002) *J. Cell Biol.* **158**, 997-1003.
6. Cole, D. G., Saxton, W. M., Sheehan, K. B. & Scholey, J. M. (1994). *J. Biol. Chem.* **269**, 22913-22916.
