# Supplementary material
Source: PubMed Central journal article supplement (PMC524698)

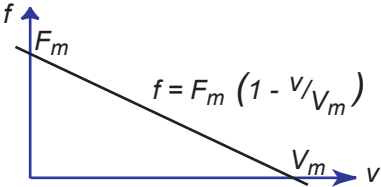

Supplement: pnas_101_45_15938__2.pdf [file pnas_101_45_15938__2.pdf]

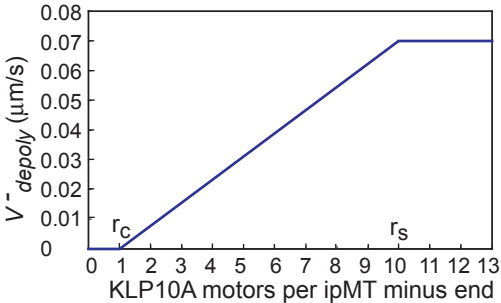

Supplement: pnas_101_45_15938__4.pdf [file pnas_101_45_15938__4.pdf]

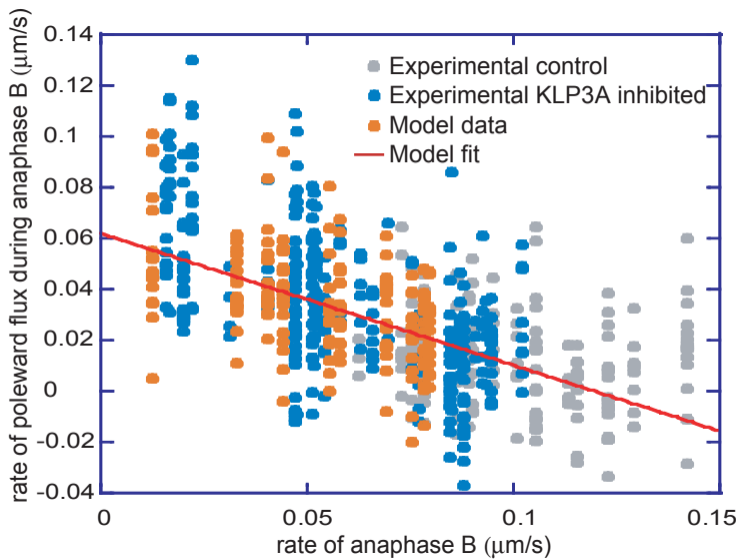

Supplement: pnas_101_45_15938__5.pdf [file pnas_101_45_15938__5.pdf]
